# Supplementary material
Source: PubMed Central journal article supplement (PMC3028254)

# Supplemental Figure 1

## A

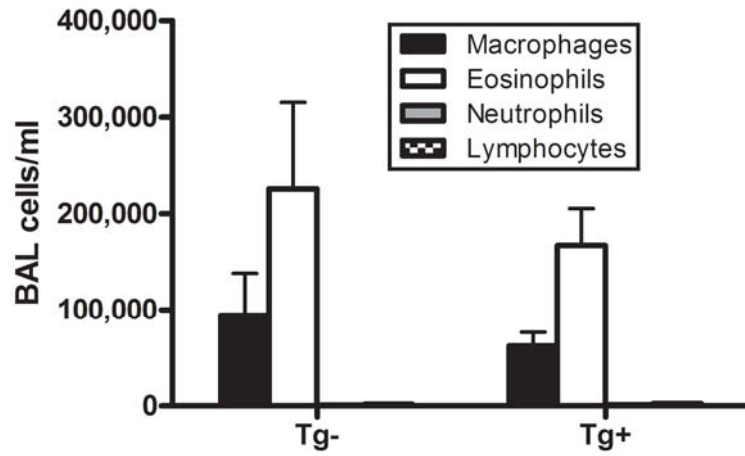

## B

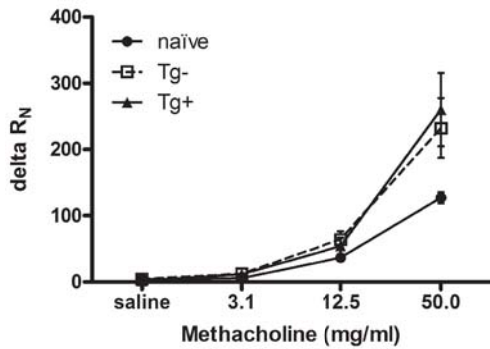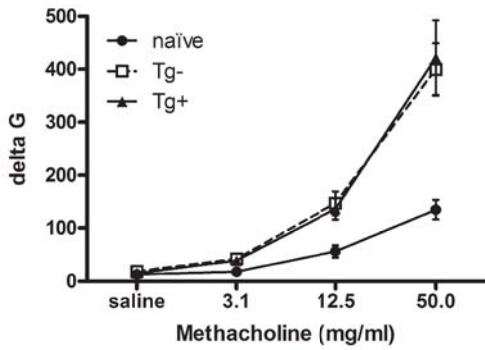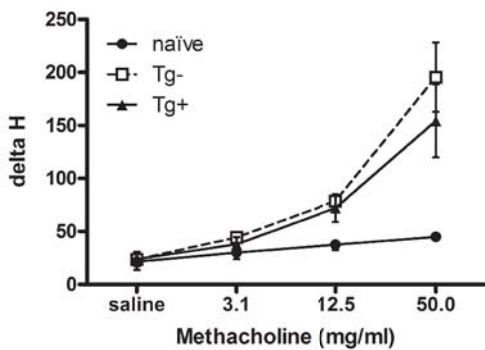

## C

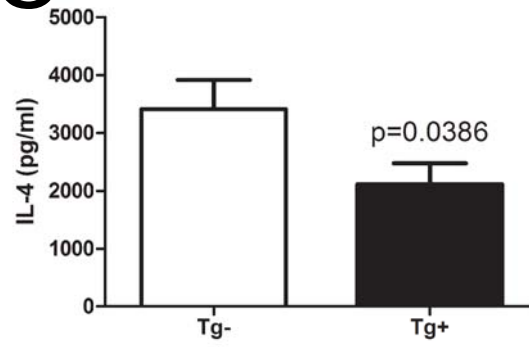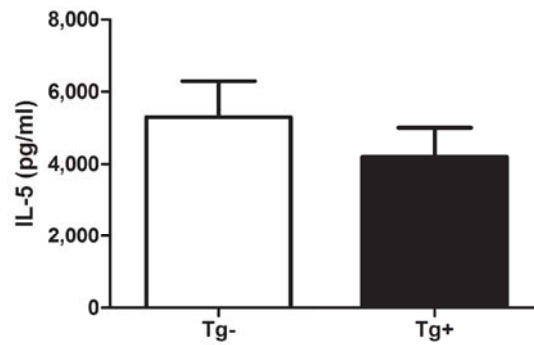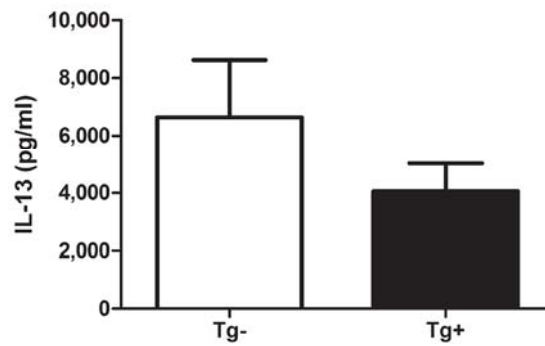

Supplement: supp_44_1_11__2.pdf [file supp_44_1_11__2.pdf]
